# Supplementary material
Source: HighWire-hosted journal article supplement (https://bjgp.org/highwire/filestream/45429/field_highwire_adjunct_files/0/BJGP.2022.0193_suppl.pdf)
Supplement: BJGP.2022.0193_suppl.pdf [file BJGP.2022.0193_suppl.pdf]

**Table S1** Definitions of different levels of GP-recorded pregnancy indicators reflecting GPs' awareness of pregnancy

| Type of indicator             | Operationalisation                                                                                                                                                                                                                                                                                                                                                                                                                                                                                                                                                                                                                                                                                                                                                                                                                                  | Code(s)                                                                                                                                                                                                                                                                                                                                                                                                                                                                                                                                                                                                                                                                                                                                                                                                                                                                                                         | Search terms                                                                                                                                                                                                                   |
|-------------------------------|-----------------------------------------------------------------------------------------------------------------------------------------------------------------------------------------------------------------------------------------------------------------------------------------------------------------------------------------------------------------------------------------------------------------------------------------------------------------------------------------------------------------------------------------------------------------------------------------------------------------------------------------------------------------------------------------------------------------------------------------------------------------------------------------------------------------------------------------------------|-----------------------------------------------------------------------------------------------------------------------------------------------------------------------------------------------------------------------------------------------------------------------------------------------------------------------------------------------------------------------------------------------------------------------------------------------------------------------------------------------------------------------------------------------------------------------------------------------------------------------------------------------------------------------------------------------------------------------------------------------------------------------------------------------------------------------------------------------------------------------------------------------------------------|--------------------------------------------------------------------------------------------------------------------------------------------------------------------------------------------------------------------------------|
| <b>Pregnancy confirmation</b> | <p>At least one record during pregnancy (i.e. conception date <math>\leq</math> record date <math>\leq</math> delivery date) with any of the defined ICPC codes or search terms in any of the GP reference tables of interest: EPI, EXA, COR, MED, JRN or INV.</p> <p>The timing of pregnancy trimester was additionally grouped by pregnancy trimester according to the first recorded occurrence as follows:</p> <ul style="list-style-type: none"> <li>- <u>First trimester</u>: conception date <math>\leq</math> record date <math>&lt;</math> conception date + (13*7)</li> <li>- <u>Second trimester</u>: conception date + (13*7) <math>\leq</math> record date <math>&lt;</math> conception date + (28*7)</li> </ul> <p><u>Third trimester</u>: conception date + (28*7) <math>\leq</math> record date <math>\leq</math> delivery date</p> | <p><b>ICPC:</b></p> <p>W78 Pregnancy</p> <p>W79 Unwanted pregnancy</p>                                                                                                                                                                                                                                                                                                                                                                                                                                                                                                                                                                                                                                                                                                                                                                                                                                          | -                                                                                                                                                                                                                              |
| <b>Pregnancy indicator</b>    | <p>At least one record during pregnancy (i.e. conception date <math>\leq</math> record date <math>\leq</math> delivery date) with any of the defined ICPC codes or search terms in any of the GP reference tables of interest: EPI, EXA, COR, MED, JRN, INV or CIA.</p>                                                                                                                                                                                                                                                                                                                                                                                                                                                                                                                                                                             | <p><b>ICPC:</b></p> <p>W02 Fear of pregnancy</p> <p>W03 Antepartum bleeding</p> <p>W05 Pregnancy vomiting/nausea</p> <p>W17 Post-partum bleeding</p> <p>W18 Post-partum symptom/complaint oth.</p> <p>W19 Breast/lactation symptom/complaint</p> <p>W21 Concern body image in pregnancy</p> <p>W27 Fear complications of pregnancy</p> <p>W28 Limited function/disability (w)</p> <p>W29 Pregnancy symptom/complaint other</p> <p>W70 Puerperal infection/sepsis</p> <p>W71 Infection complicating pregnancy</p> <p>W72 Malignant neoplasm relate to preg.</p> <p>W73 Benign/unspec. neoplasm/pregnancy</p> <p>W75 Injury complicating pregnancy</p> <p>W76 Congenital anomaly complicate preg.</p> <p>W78 Pregnancy</p> <p>W79 Unwanted pregnancy</p> <p>W80 Ectopic pregnancy</p> <p>W81 Toxaemia of pregnancy</p> <p>W82 Abortion spontaneous</p> <p>W83 Abortion induced</p> <p>W84 Pregnancy high risk</p> | <p>All search terms indicating pregnancy (e.g. 'zwangerschap', 'moeder geworden', 'bevallen', 'gravida', 'gynaecologist') excl. those indicating the wish to get pregnant (e.g. 'zwangerschapswens', 'wil zwanger worden')</p> |

| Type of indicator                      | Operationalisation                                                                                                                                                                              | Code(s)                                                                                                                                                                                                                                                                                                                                                                                                                                                                                                                                                                                                                                                                                                                                       | Search terms                                 |
|----------------------------------------|-------------------------------------------------------------------------------------------------------------------------------------------------------------------------------------------------|-----------------------------------------------------------------------------------------------------------------------------------------------------------------------------------------------------------------------------------------------------------------------------------------------------------------------------------------------------------------------------------------------------------------------------------------------------------------------------------------------------------------------------------------------------------------------------------------------------------------------------------------------------------------------------------------------------------------------------------------------|----------------------------------------------|
|                                        |                                                                                                                                                                                                 | W85 Gestational diabetes<br>W90 Uncomplicate labour/delivery live<br>W91 Uncomplicate labour/delivery still<br>W92 Complicate labour/ delivery livebirth<br>W93 Complicate labour/delivery stillbirth<br>W94 Puerperal mastitis<br>W95 Breast disorder in pregnancy other<br>W96 Complications of puerperium other<br>W99 Disorder pregnancy/delivery, other<br><br><b>WCIA:</b><br>439 Urine pregnancy test (positive)<br>1282 Rhesus (screening pregnancy)<br>1883 Duration pregnancy<br>2030 Pregnancy (comorbidity)<br>2187 Urine pregnancy test stick (positive)<br>2349 Uterine ultrasound pregnancy<br>2997 Date planned ultrasound pregnancy<br>3271 Fetal rhesus D typing (screening pregnancy)<br>3753 HCG Pregnancy Urine POC test |                                              |
| <b>Pregnancy contra-indication</b>     | At least one record during pregnancy (i.e. conception date ≤ record date ≤ delivery date) with any of the defined ICPC codes or search terms in the CIA GP reference table.                     | <b>CIA:</b><br>1320 Pregnancy                                                                                                                                                                                                                                                                                                                                                                                                                                                                                                                                                                                                                                                                                                                 | 'Pregnancy' (only in case CIA code is empty) |
| <b>Preconceptional GP consultation</b> | At least one record in the year before pregnancy (i.e. conception date - 365 ≤ record date < conception date) with any of the defined ICPC codes or search terms in the EPI GP reference table. | <b>ICPC:</b><br>A97.02 Wish to have children                                                                                                                                                                                                                                                                                                                                                                                                                                                                                                                                                                                                                                                                                                  | -                                            |

CIA = contra-indications, for recording diagnoses part of drug surveillance; COR = correspondence, for recording correspondence to and from other care providers; EPI = episodes, for recording the patient's health problem during an encounter; EXA = examinations, for recording diagnostics such as laboratory results; ICPC = International Classification of Primary Care; INV = invoices, for recording actions and the associated financial reimbursement; JRN = journals, recording all patient contacts as well as the undertaken action according to the SOEP-system (Subjective, Objective, Evaluation, Plan); MED = medication, including all medication records as prescribed by the GP; WCIA = Werkgroep Coördinatie Informatie Automatisering.

**Table S2** ATC codes for use of medication for chronic conditions

| <b>Chronic condition</b>                     | <b>ATC</b>          |
|----------------------------------------------|---------------------|
| Drugs used in diabetes                       | A10                 |
| Corticosteroids, dermatological preparations | D07                 |
| Corticosteroids for systemic use             | H02                 |
| Thyroid therapy                              | H03                 |
| Anti-inflammatory and antirheumatic products | M01                 |
| Antimigraine medication                      | N02C                |
| Antiepileptics                               | N03A                |
| Antipsychotics                               | N05A, excl. N05AB04 |
| Antidepressants                              | N06A                |
| Antiasthmatics                               | R03                 |

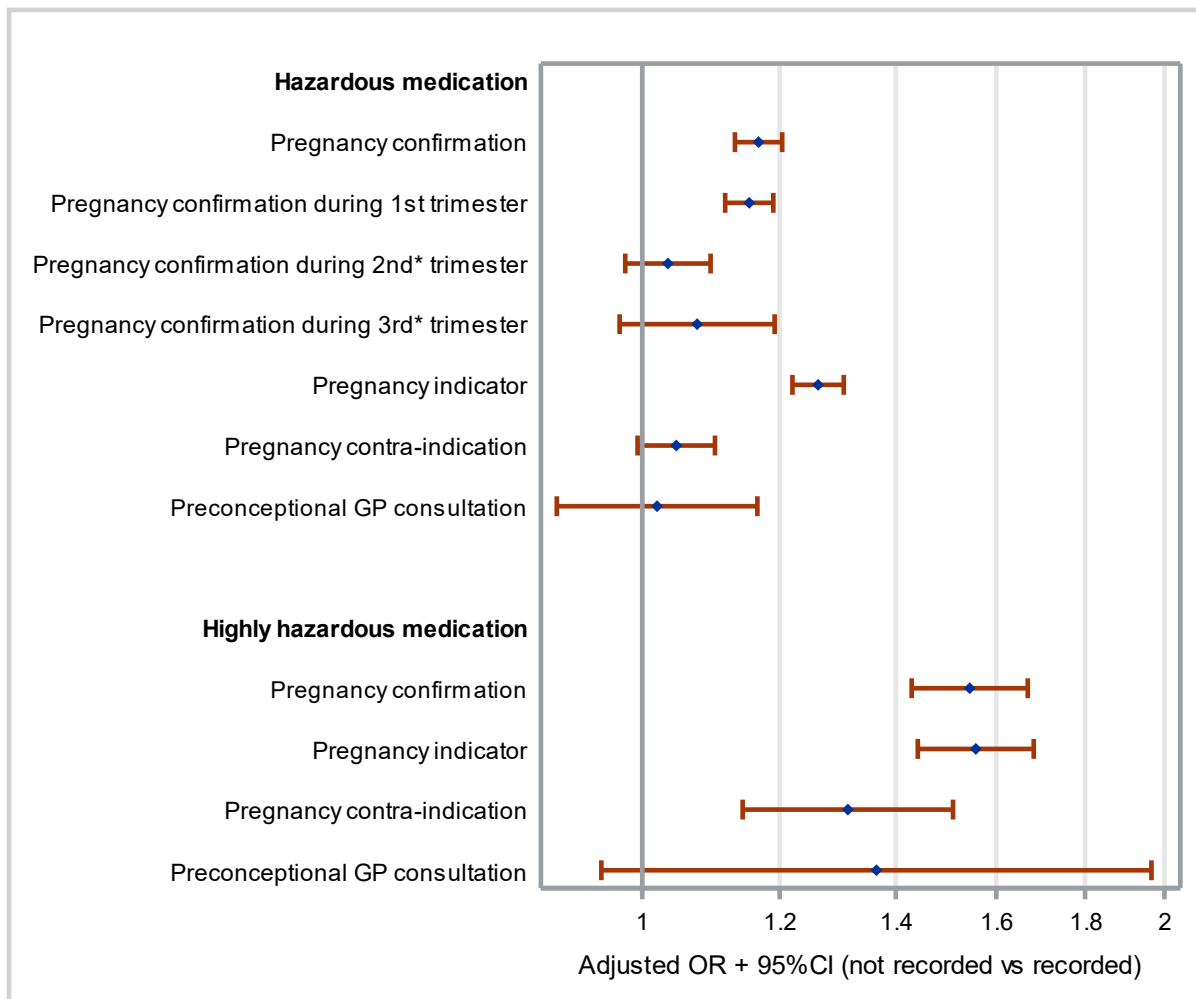

\*First recorded, i.e. without recorded pregnancy confirmation in the prior trimester(s)

**Figure S1** Likelihood of (highly) hazardous medication being dispensed during pregnancy by selected GP-recorded pregnancy indicators reflecting GPs' awareness

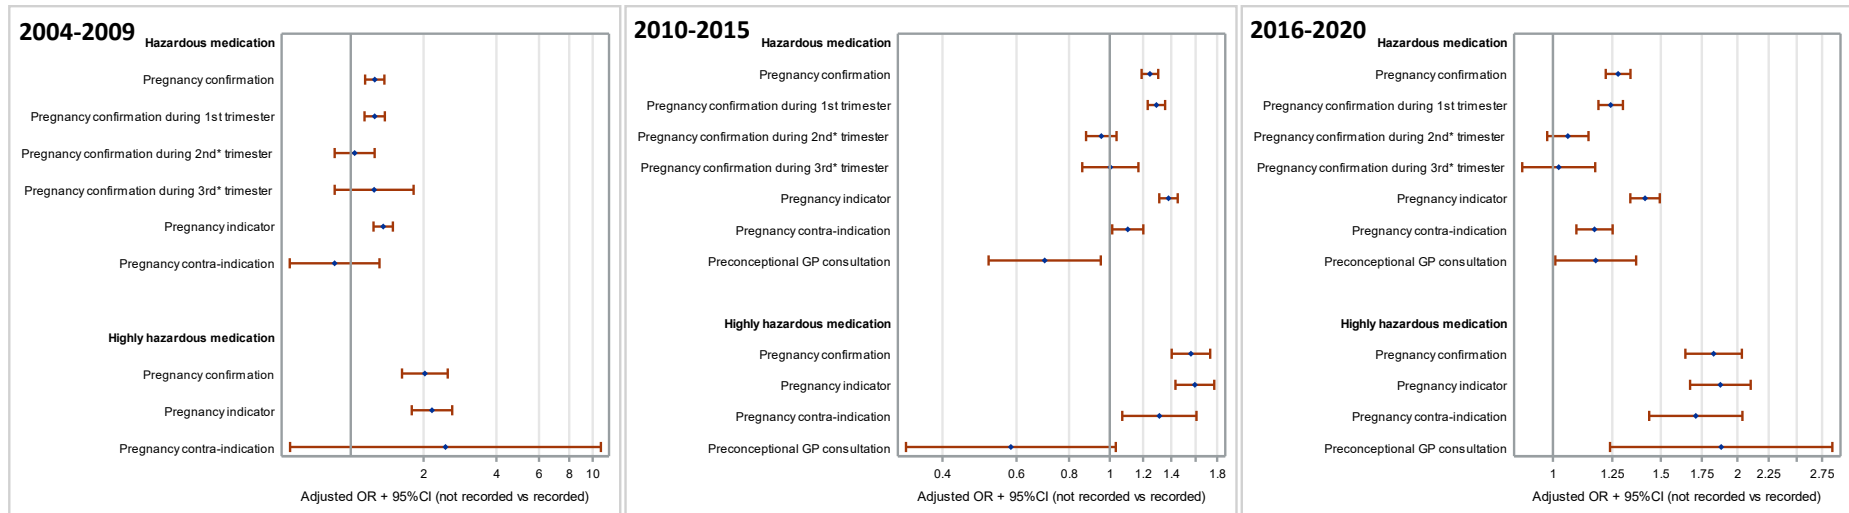

\*First recorded, i.e. without recorded pregnancy confirmation in the prior trimester(s)

**Figure S2** Likelihood of (highly) hazardous medication being prescribed during pregnancy by selected GP-recorded pregnancy indicators reflecting GPs' awareness, by year of delivery
